# Supplementary material for: Deep splicing plasticity of the human adenovirus type 5 transcriptome drives virus evolution
Source: PubMed Central journal article supplement (PMC7070027; doi:10.1038/s42003-020-0849-9), 2020-03-13
Supplement: 42003_2020_849_MOESM17_ESM.pdf [file 42003_2020_849_MOESM17_ESM.pdf]

## Description of additional supplementary items

Supplementary\_Data\_1\_16hpi\_TSS\_analysis.xlsx

*Analysis of transcription start sites at 16hpi*

Supplementary\_Data\_2\_24hpi\_TSS\_analysis.xlsx

*Analysis of transcription start sites at 24hpi*

Supplementary\_Data\_3\_48hpi\_TSS\_analysis.xlsx

*Analysis of transcription start sites at 48hpi*

Supplementary\_Data\_4\_Ad5\_162448hpi.combined\_counts\_and\_feature\_names.xlsx

*List of all identified transcript groups, each group is also tagged with known features from the virus transcriptome.*

Supplementary\_Data\_5\_16\_24\_48\_time\_course.xlsx

*Table comparing the quantities of identified transcripts at each time point and polyA lengths. Also included here is the statistical analysis of the polyA lengths.*

Supplementary\_Data\_6\_A549\_Ad5\_compare\_to\_nanopore.illumina\_juncs\_and\_summary.xlsx

*List of locations and observation frequencies for illumina identified splice sites together with notation on whether they were also observed by nanopore and how many independent illumina reads confirm each site*

Supplementary\_Data\_7\_A549\_Ad5\_compare\_to\_nanopore.evidence\_poor.xlsx

*List of nanopore transcripts where at least one splice site cannot be confirmed by illumina data.*

Supplementary\_Data\_8\_A549\_Ad5\_compare\_to\_nanopore.evidence\_good.xlsx

*List of nanopore transcripts where all the splice sites are confirmed by illumina data including notation on how many independent illumina reads confirm the nanopore observed splice sites.*

Supplementary\_data\_9\_Ad5\_features\_table.txt

*List of features on the adenovirus genome used to annotate the transcripts in the software name\_transcripts\_and\_track\_ssc.pl*

Supplementary\_data\_10\_Ad5\_162448hpi\_most\_abundant\_trans\_per\_orf.gff

*GFF file of the most abundant transcript for each known ORF across all timepoints*

Supplementary\_data\_11\_Ad5\_48hpi\_most\_abundant\_trans\_per\_orf.gff

*GFF file of the most abundant transcript for each known ORF at 48 hpi*

Supplementary\_data\_12\_Ad5\_24hpi\_most\_abundant\_trans\_per\_orf.gff  
*GFF file of the most abundant transcript for each known ORF at 24 hpi*

Supplementary\_data\_13\_Ad5\_16hpi\_most\_abundant\_trans\_per\_orf.gff  
*GFF file of the most abundant transcript for each known ORF at 16 hpi*

Supplementary\_data\_14\_Ad5\_162448hpi.count\_of\_translated\_features.xlsx  
*A spreadsheet of the observed counts for each known ORF combining all three timepoints*
